# Supplementary material for: A calibrated UV-LED based light source for water purification and characterisation of photocatalysis
Source: Royal Society of Chemistry journal article supplement (doi:10.1039/c7pp00269f), 2017-10-16
Supplement: c7pp00269f1.pdf [file c7pp00269f1.pdf]

### Supplementary

#### A calibrated UV-LED based light source for water purification and characterisation of photocatalysis

A. Sergejevs, C. T. Clarke, D. W. E. Allsopp, J. Marugan, A. Jaroenworarluck, W. Singhapong, P. Manpetch, R. Timmers, C. Casado, and C. R. Bowen

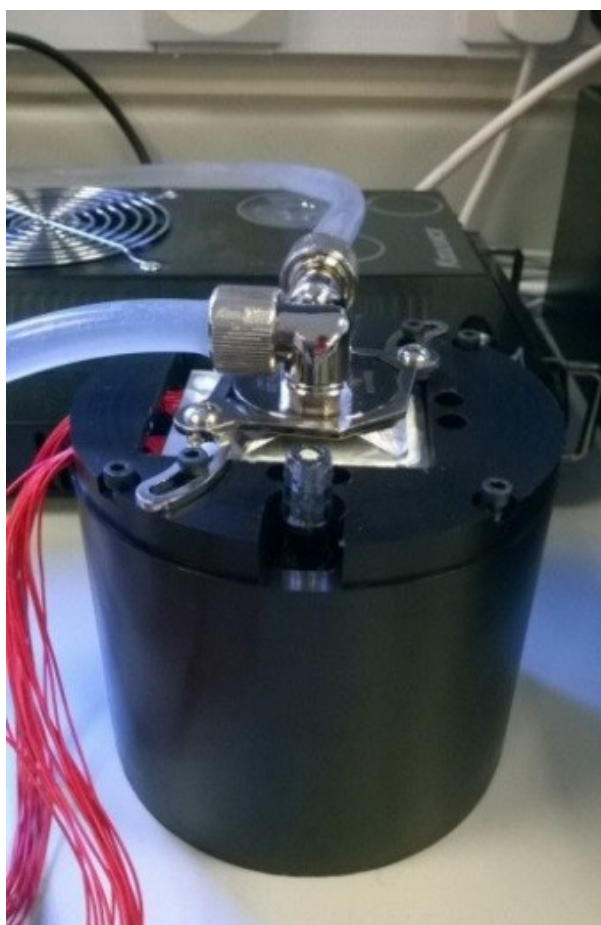

**Figure S1.** Image of reactor in Fig. 2a. UV-LEDs are located at top.

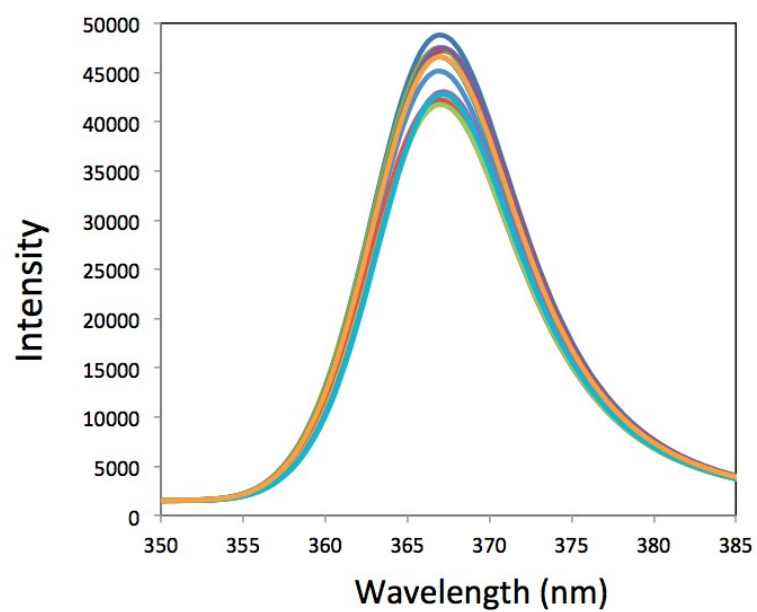

**Fig. S2.** Example of variation between individual LEDs.

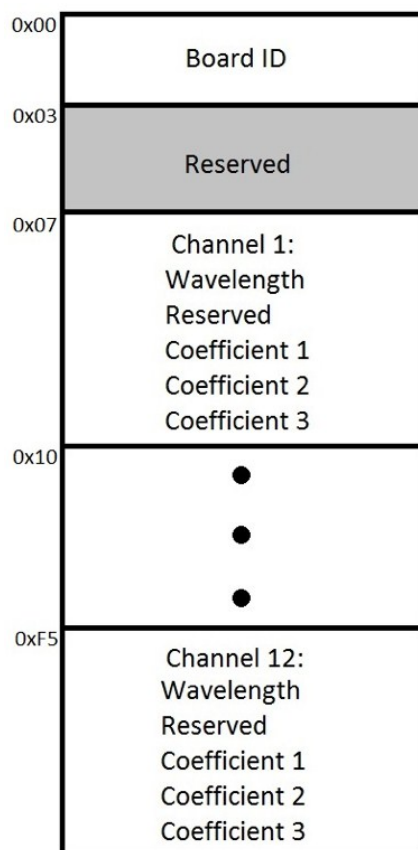

**Fig. S3.** Memory map of the EEPROM of the LED board. Each value in the memory occupies two bytes.
